# Supplementary material for: Cryptosporidium PI(4)K inhibitor EDI048 is a gut-restricted parasiticidal agent to treat paediatric enteric cryptosporidiosis
Source: PubMed Central journal article supplement — Nat Microbiol. 2024 Oct 8;9(11):2817–35. doi: 10.1038/s41564-024-01810-x (PMC11522000; doi:10.1038/s41564-024-01810-x), 2024-10-08
Supplement: 41564_2024_1810_MOESM1_ESM.pdf [file 41564_2024_1810_MOESM1_ESM.pdf]

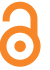

---

# ***Cryptosporidium* PI(4)K inhibitor EDI048 is a gut-restricted parasitocidal agent to treat paediatric enteric cryptosporidiosis**

---

In the format provided by the authors and unedited

---

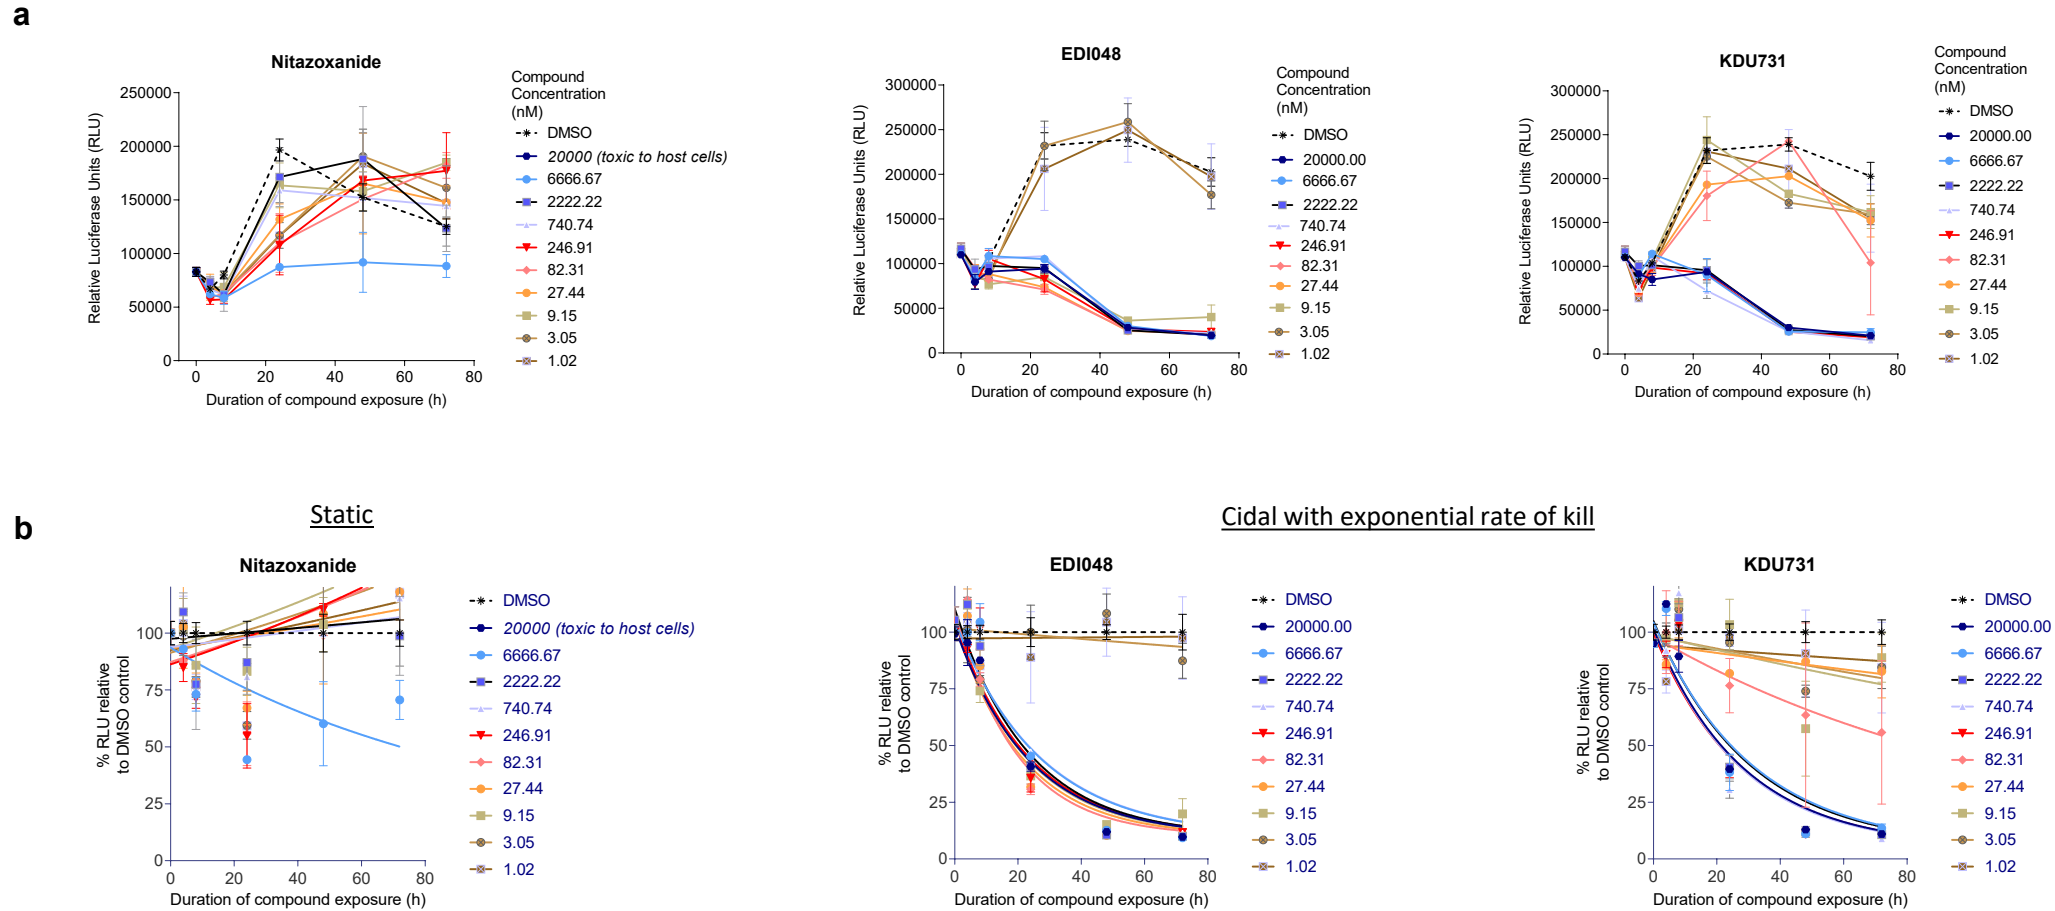

**Supplementary Figure 1: EDI048 and KDU731 are parasiticidal with an exponential rate of kill while nitazoxanide is parasitistatic. a**, Raw data with relative luminescence units (RLU) demonstrating parasitistatic nature of nitazoxanide and parasiticidal activity of EDI048 and KDU731. **b**, One-phase exponential decay curve fit for nitazoxanide, KDU731 and EDI048 using time-kill data normalized to percentage of the data for the DMSO control for each time point. For nitazoxanide: at 6.7  $\mu\text{M}$ ,  $r^2 = 0.37$ ,  $k = 0.01020$  and  $T_{1/2} = 67.97$  h. For EDI048: at 20  $\mu\text{M}$ ,  $r^2 = 0.94$ ,  $k = 0.04297$ , and  $T_{1/2} = 16.13$  h; and at 9.15 nM,  $r^2 = 0.91$ ,  $k = 0.04410$ ,  $T_{1/2} = 15.72$  h. For KDU731: at 20  $\mu\text{M}$ ,  $r^2 = 0.91$ ,  $k = 0.03567$ ,  $T_{1/2} = 19.43$  h; and at 0.247  $\mu\text{M}$ ,  $r^2 = 0.91$ ,  $k = 0.03561$ , and  $T_{1/2} = 19.47$  h. EDI048 is a potent candidate and showed a steep dose response curve in the cidality assay. A higher resolution experiment with 2-fold dilution between 9-27 nM would be needed to reveal the expected dose response behavior of EDI048. All data are mean and SD of at least 2 technical replicates and representative of 2 independent experiments.

**Supplementary Table 1** | Effect of EDI048, Compounds **6** and **7** on radio-ligand binding to a panel of human recombinant receptors and pharmacologically relevant proteases/kinases

| Binding assay*             | IC <sub>50</sub> (μM) |     |      | Kinase assay | IC <sub>50</sub> (μM) |      |      |
|----------------------------|-----------------------|-----|------|--------------|-----------------------|------|------|
|                            | EDI048                | 6   | 7    |              | EDI048                | 6    | 7    |
| Acetylcholinesterase       | >30                   | >30 | >30  | ABL1         | >30                   | >30  | >30  |
| Adenosine 3 receptor       | >30                   | -   | -    | AKT1         | >30                   | >30  | >30  |
| Adrenergic α1A receptor    | >30                   | >30 | >30  | ALK          | >30                   | >30  | >30  |
| Adrenergic α2A receptor    | >30                   | >30 | >30  | ATM          | 0.445                 | 3.78 | 10.2 |
| Androgen receptor          | >30                   | >30 | >30  | AURKA        | >30                   | 15   | 10   |
| Benzodiazepine receptor *  | >30                   | >30 | >30  | AXL          | >30                   | >30  | >30  |
| Cyclooxygenase 1 #         | >30                   | >30 | >30  | CAMK1        | >30                   | >30  | >30  |
| Cyclooxygenase 2           | >30                   | >30 | >30  | CAMK2D       | >30                   | >30  | 4.25 |
| Dopamine D1 receptor       | >30                   | >30 | >30  | CDK2         | >30                   | >30  | 21.8 |
| Dopamine D3 receptor       | >30                   | >30 | >30  | CDK4         | >30                   | >30  | >30  |
| Dopamine transporter       | >30                   | >30 | >30  | CSNK1D       | >30                   | >30  | >30  |
| Estrogen receptor          | >30                   | >30 | >30  | DMPK         | >30                   | >30  | >30  |
| Histamine H3 receptor      | >30                   | >30 | >30  | EGFR         | >30                   | >30  | >30  |
| Monoamine oxidase A        | >30                   |     |      | EIF2AK4      | >30                   | >30  | >30  |
| Muscarinic M1 receptor     | >30                   | >30 | >30  | EPHA4        | >30                   | >30  | >30  |
| Muscarinic M2 receptor     | >30                   | >30 | >30  | ERBB2        | >30                   | >30  | >30  |
| Norepinephrine transporter | >30                   | >30 | >30  | FGFR2        | >30                   | >30  | >30  |
| Opioid mu receptor         | >30                   | >30 | >30  | FGFR3        | >30                   | >30  | >30  |
| Progesterone receptor      | >30                   | >30 | >30  | FGFR4        | >30                   | >30  | >30  |
| Prostanoid TP              | >30                   | >30 | >30  | Fit-1        | >30                   | >30  | >30  |
| Phosphodiesterase 3        | >30                   | >30 | >30  | GRK1         | >30                   | >30  | >30  |
| Phosphodiesterase 4D       | 2.22                  | >30 | 12.2 | GSK3B        | 19.1                  | 25   | 19.2 |
| Serotonin 5-HT 1A receptor | >30                   | >30 | >30  | IGF1R        | >30                   | >30  | >30  |
| Serotonin 5-HT2b receptor  | >30                   | >30 | >30  | INSR         | >30                   | >30  | >30  |
| Serotonin transporter      | 29.8                  | >30 | >30  | IRK1         | >30                   | >30  | >30  |
| Thrombin                   | >30                   | >30 | >30  | JAK1         | >30                   | >30  | >30  |
|                            |                       |     |      | JAK2         | >30                   | >30  | >30  |
|                            |                       |     |      | JAK3         | >30                   | >30  | 16.5 |
|                            |                       |     |      | KDR          | >30                   | >30  | >30  |
|                            |                       |     |      | KIT          | >30                   | >30  | >30  |
|                            |                       |     |      | LCK          | >30                   | >30  | >30  |
|                            |                       |     |      | MAP2K3       | >30                   | >30  | >30  |
|                            |                       |     |      | MAP3K2       | >30                   | >30  | >30  |
|                            |                       |     |      | MAPK14       | >30                   | >30  | >30  |
|                            |                       |     |      | MAPK1        | >30                   | >30  | >30  |
|                            |                       |     |      | MAPKAPK2     | >30                   | >30  | >30  |
|                            |                       |     |      | MAPKAPK5     | >30                   | >30  | >30  |
|                            |                       |     |      | MET          | >30                   | >30  | >30  |
|                            |                       |     |      | MKMK2        | >30                   | >30  | 3.43 |
|                            |                       |     |      | NEK11        | >30                   | >30  | >30  |
|                            |                       |     |      | PDPK1        | >30                   | >30  | >30  |

|  |  |  |  |         |      |      |        |
|--|--|--|--|---------|------|------|--------|
|  |  |  |  | PIM1    | 3.72 | >30  | 0.0937 |
|  |  |  |  | PKN2    | >30  | >30  | >30    |
|  |  |  |  | PRKAA2  | >30  | >30  | 4.7    |
|  |  |  |  | PRKACA  | >30  | >30  | >30    |
|  |  |  |  | PRKCA   | >30  | >30  | >30    |
|  |  |  |  | PRKCQ   | >30  | >30  | >30    |
|  |  |  |  | RAF1    | >30  | >30  | >30    |
|  |  |  |  | RET     | >30  | >30  | >30    |
|  |  |  |  | ROCK2   | >30  | >30  | >30    |
|  |  |  |  | RPS6KB1 | >30  | >30  | >30    |
|  |  |  |  | SLK     | >30  | >30  | 11.5   |
|  |  |  |  | SYK     | >30  | >30  | >30    |
|  |  |  |  | TGFBR1  | >30  | >30  | >30    |
|  |  |  |  | TRIB2   | 3.48 | 11.9 | 4.61   |
|  |  |  |  | TYK2    | >30  | >30  | 23.5   |
|  |  |  |  | WEE1    | >30  | >30  | >30    |
|  |  |  |  | WNK1    | >30  | >30  | >30    |
|  |  |  |  | ZAP70   | >30  | >30  | >30    |

\*all human except ♦rat #sheep

**Supplementary Table 2** | Calf clinical illness fecal consistency rubric

| <b>Score</b> | <b>Fecal consistency</b>                                                                                                                                                                                                                                     |
|--------------|--------------------------------------------------------------------------------------------------------------------------------------------------------------------------------------------------------------------------------------------------------------|
| <b>1</b>     | <b>Normal</b> ; Feces retain form. The feces may be pasty but do no flow across a surface                                                                                                                                                                    |
| <b>2</b>     | <b>Mild to moderate diarrhea</b> ; Form is a puddle, not a patty. Sufficient water content to slowly flow across or down a surface leaving some material adherent to the surface.                                                                            |
| <b>3</b>     | <b>Severe diarrhea</b> ; Watery feces or feces with sufficient water content to easily flow across or down a surface leaving little to no adherent material. Calf may have very watery feces followed by some solid material and still have severe diarrhea. |
