# Supplementary material for: Cryptosporidium PI(4)K inhibitor EDI048 is a gut-restricted parasiticidal agent to treat paediatric enteric cryptosporidiosis
Source: PubMed Central journal article supplement — Nat Microbiol. 2024 Oct 8;9(11):2817–35. doi: 10.1038/s41564-024-01810-x (PMC11522000; doi:10.1038/s41564-024-01810-x), 2024-10-08
Supplement: 41564_2024_1810_MOESM8_ESM.pdf [file 41564_2024_1810_MOESM8_ESM.pdf]

LC MS Report

Date:24-Jun-2019  
Instrument:ACQ-SQD#LBA849

Vial:2:21  
Time:08:43:41  
ID:

Description:  
Sample: 5

Printed: Mon Jun 24 08:46:14 2019

Sample Report:

Sample 5 Vial 2:21 ID [REDACTED] 24-Jun-2019 08:43:41 EM\_SQD2

2: UV Detector: 220

2.781  
Range: 2.802

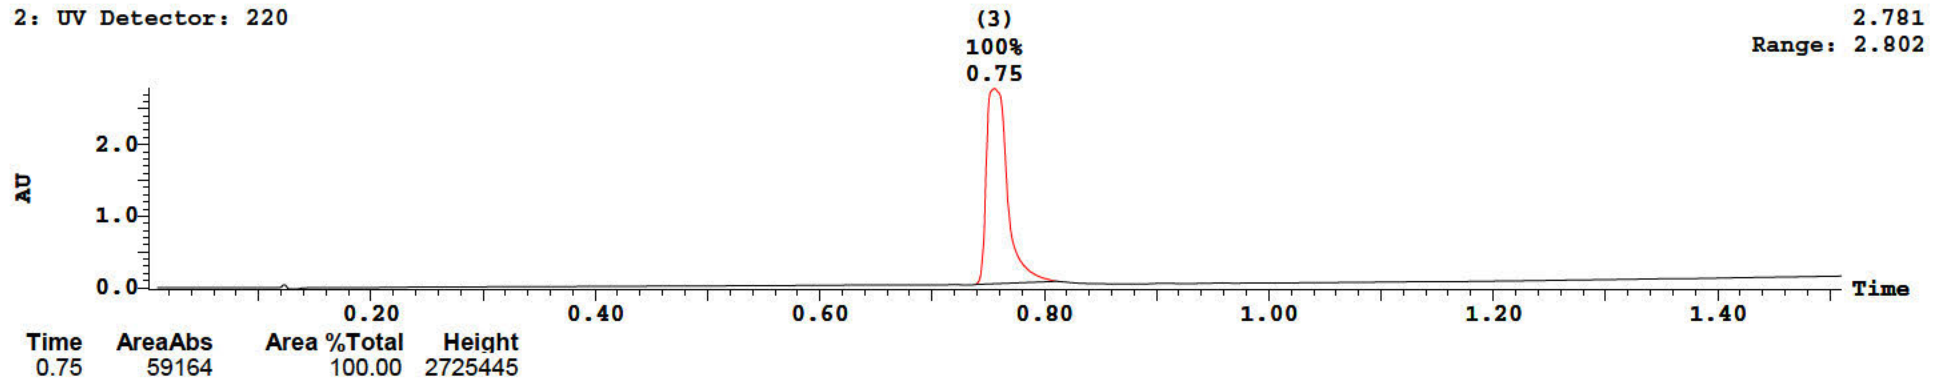

1: MS ES+ :TIC Smooth (Mn, 1x1)

1.4e+008

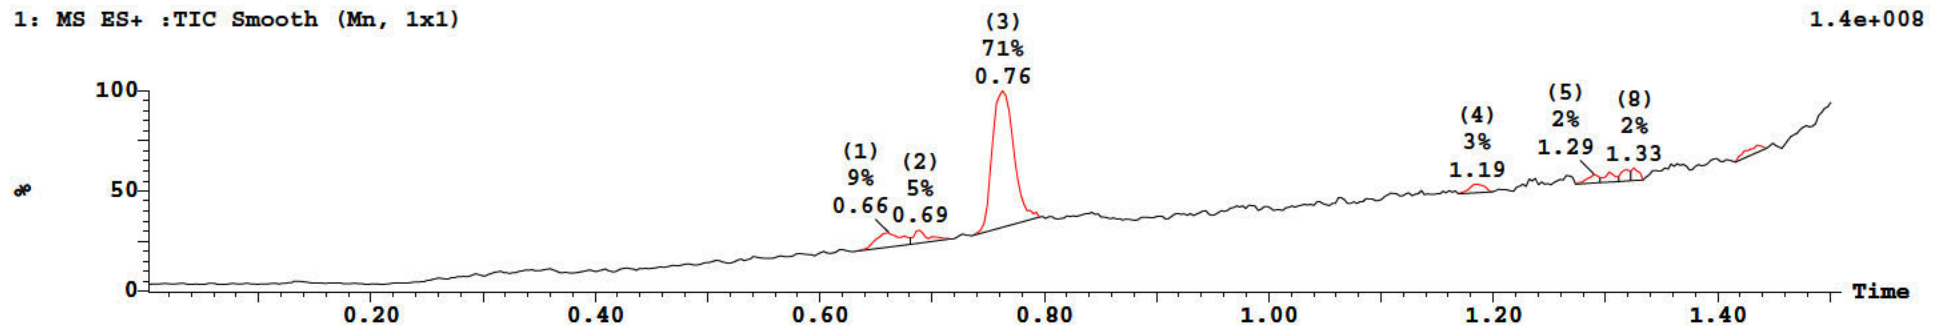

Date:24-Jun-2019  
 Instrument:ACQ-SQD#LBA849

Vial:2:21  
 Time:08:43:41  
 ID:

Description:  
 Sample: 5

Printed: Mon Jun 24 08:46:14 2019

Sample Report (continued):

Peak ID Time BPM  
 1 0.66 356.0

1:(Time: 0.66) Combine (223:259-(168:185+297:314))

1:MS ES+  
 9.3e+005

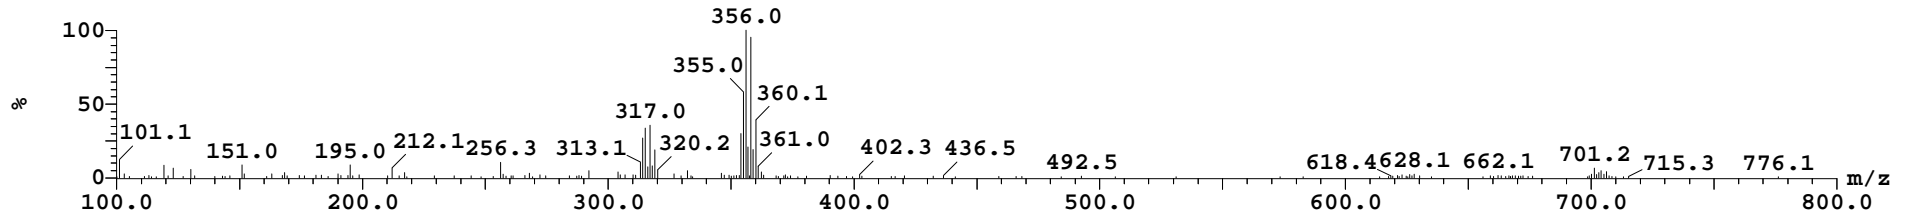

Peak ID Time BPM  
 2 0.69 356.0

2:(Time: 0.69) Combine (233:269-(178:195+307:324))

1:MS ES+  
 1.0e+006

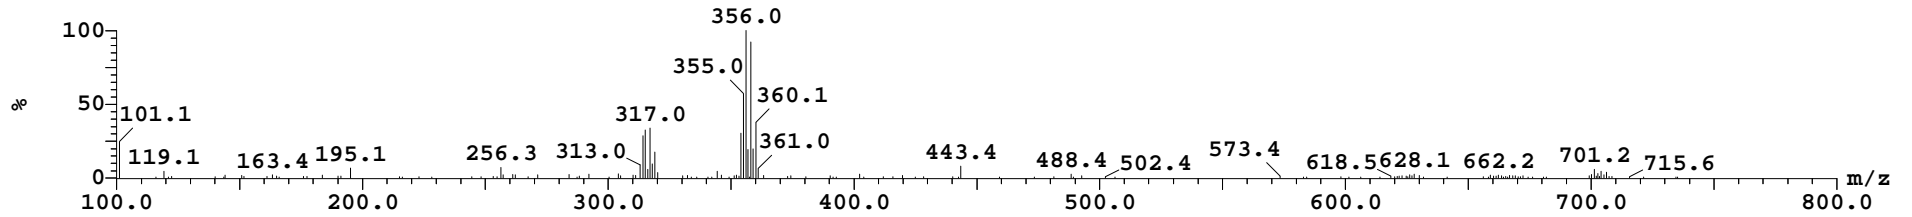

Peak ID Time BPM  
 3 0.76 477.3

3:(Time: 0.76) Combine (260:296-(205:222+334:351))

1:MS ES+  
 1.9e+007

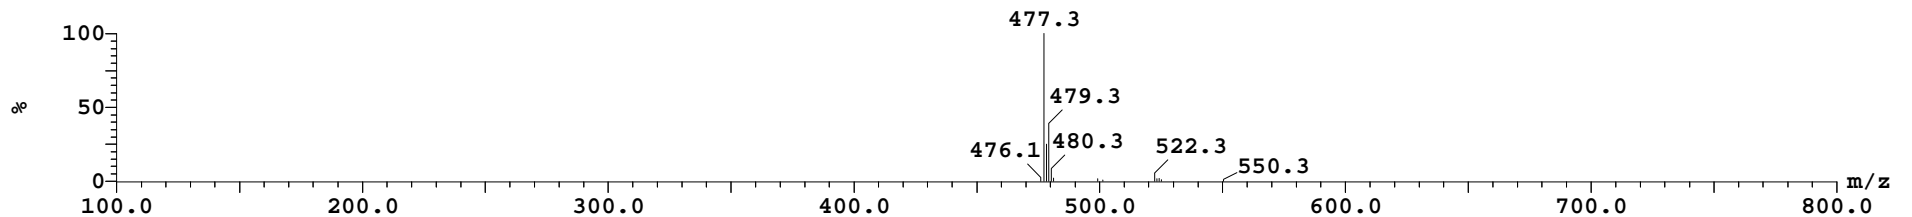

Date:24-Jun-2019  
Instrument:ACQ-SQD#LBA849

Vial:2:21  
Time:08:43:41  
ID:

Description:  
Sample: 5

Printed: Mon Jun 24 08:46:14 2019

Sample Report (continued):

Peak ID Time BPM  
4 1.19 300.3

4:(Time: 1.19) Combine (414:450-(359:376+488:505))

1:MS ES+  
8.2e+004

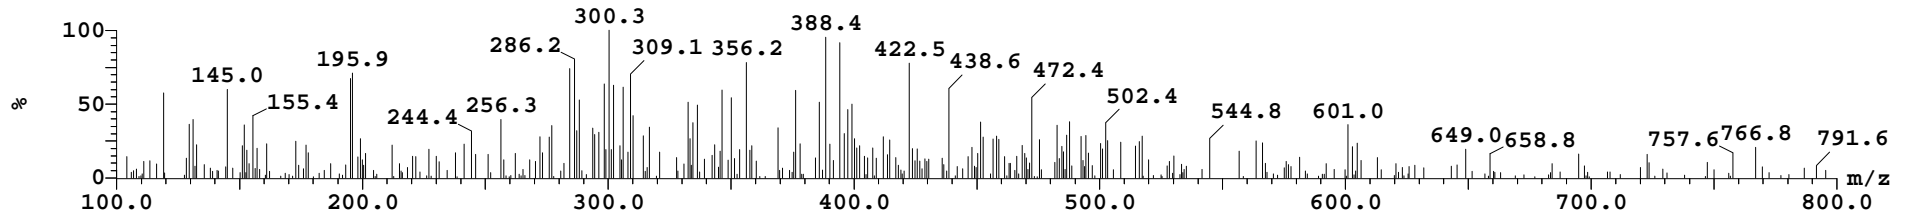

Peak ID Time BPM  
5 1.29 478.5

5:(Time: 1.29) Combine (452:488-(397:414+526:543))

1:MS ES+  
1.1e+005

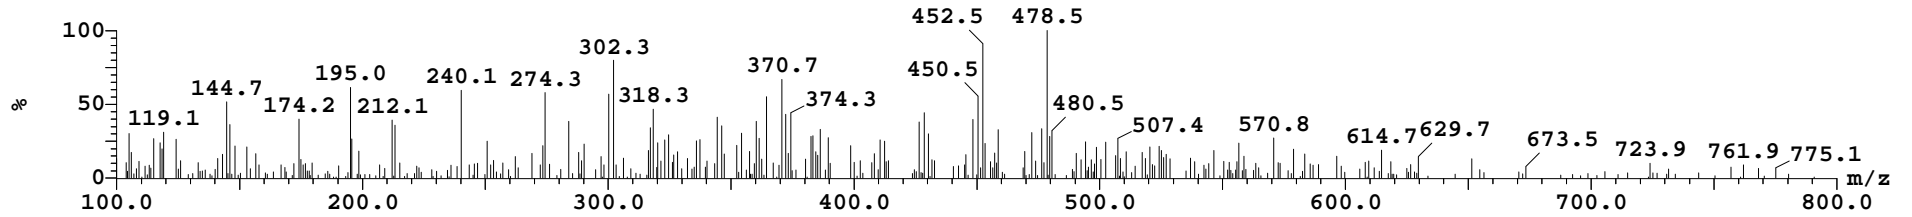

Peak ID Time BPM  
6 1.30 478.5

6:(Time: 1.30) Combine (457:493-(402:419+531:547))

1:MS ES+  
9.6e+004

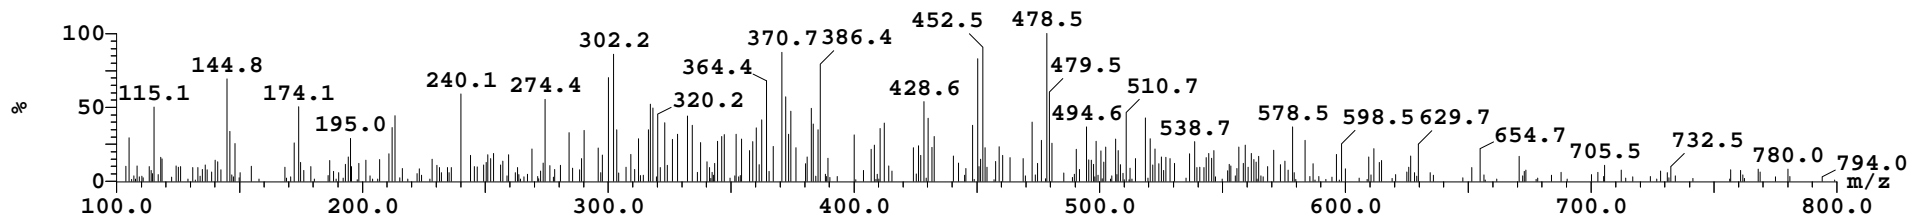

Date:24-Jun-2019  
 Instrument:ACQ-SQD#LBA849

Vial:2:21  
 Time:08:43:41  
 ID:

Description:  
 Sample: 5

Printed: Mon Jun 24 08:46:14 2019

Sample Report (continued):

Peak ID Time BPM  
 7 1.32 123.1

7:(Time: 1.32) Combine (463:499-(408:425+537:547))

1:MS ES+  
 2.6e+005

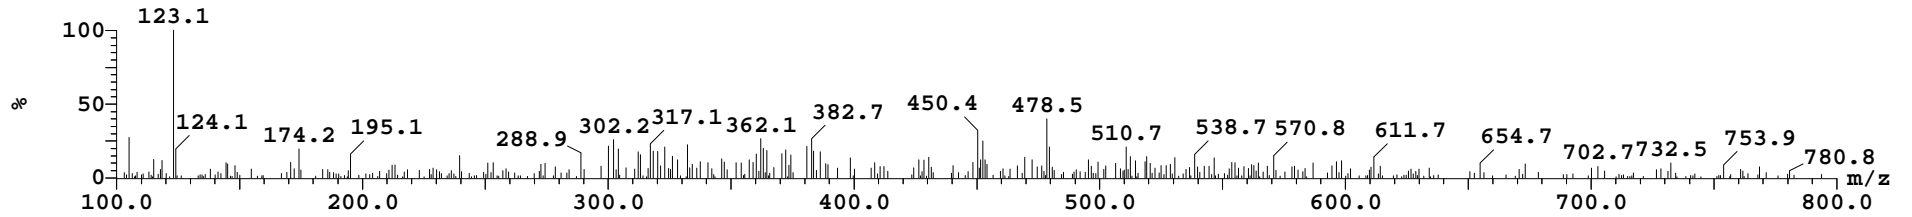

Peak ID Time BPM  
 8 1.33 123.1

8:(Time: 1.33) Combine (465:501-(410:427+539:547))

1:MS ES+  
 3.5e+005

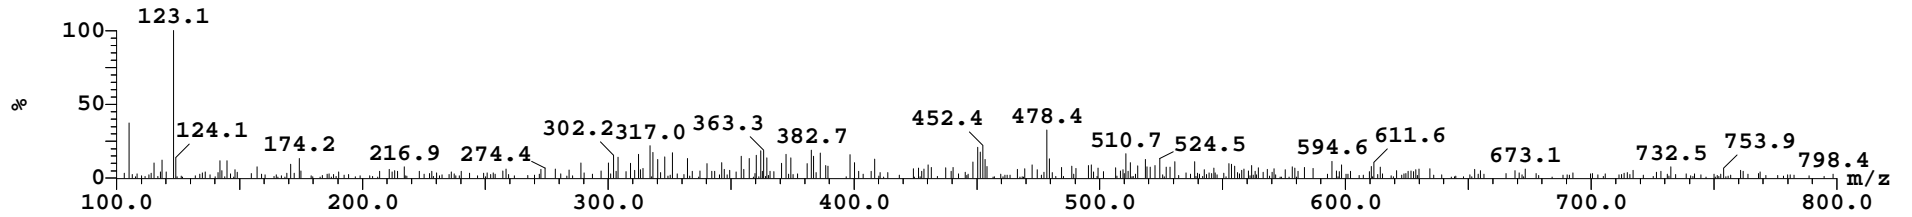

Peak ID Time BPM  
 9 1.44 101.1

9:(Time: 1.44) Combine (505:541-(450:467+1:-1))

1:MS ES+  
 5.6e+006

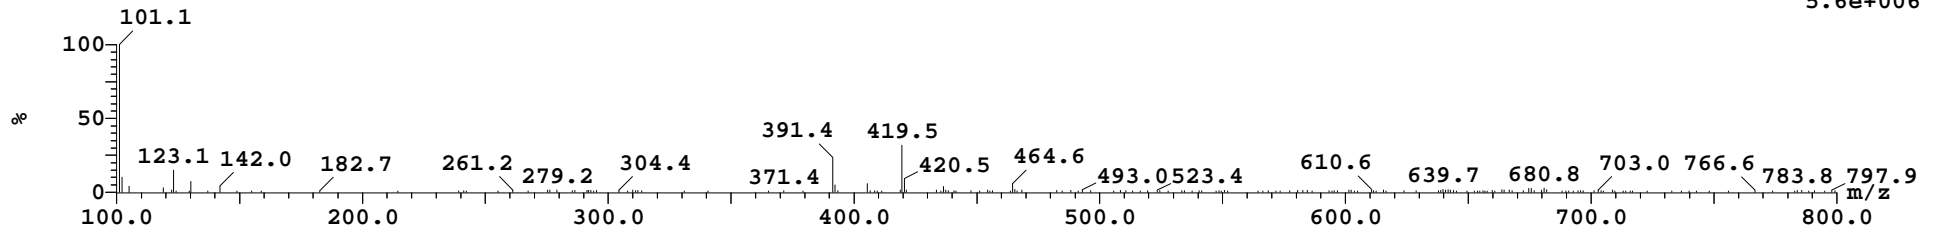

---

**LC\_MS Report**

████████████████████  
Date:24-Jun-2019  
Instrument:ACQ-SQD#LBA849

Vial:2:21  
Time:08:43:41  
ID:

Description:  
Sample: 5

Printed: Mon Jun 24 08:46:14 2019

---

**Sample Report (continued):**

**INLET**

ACE Experimental Record  
Inlet Method File: c:\masslynx\2-waters-sqd2.pro\acqddb\sqd2\_2m\_acidic  
----- Run method parameters -----

Date:24-Jun-2019  
Instrument:ACQ-SQD#LBA849

Vial:2:21  
Time:08:43:41  
ID:

Description:  
Sample: 5

Printed: Mon Jun 24 08:46:14 2019

Sample Report (continued):

PUMP

Waters Acquity SDS

----- oOo -----

End of experimental record.

----- Waters Acquity SDS Postrun Report -----

IcsVersion: 1.71.3049  
FirmwareVersion: 1.71.387 (Feb 14 2018)  
Checksum: 0x1b6b9613  
SerialNumber: G17UPB175A  
Minimum System Pressure: 4026.5  
Maximum System Pressure: 7412.9  
Average System Pressure: 6362.4  
Minimum Degasser Pressure: 1.1  
Maximum Degasser Pressure: 1.1  
Average Degasser Pressure: 1.1

----- oOo -----

----- Waters Acquity SM Postrun Report -----

Software Version: 1.70.3726  
Firmware Version: 1.65.375 (Mar 26 2015)  
Checksum: 0x42c0e8cb  
Serial Number: G11UPA235M  
Sample Syringe Size: 100.0  
Sample Loop Size: 10.0  
Needle Size: 30.0  
Minimum Sample Temperature: 20.0  
Maximum Sample Temperature: 20.0  
Average Sample Temperature: 20.0  
Minimum Column Temperature: 0.0  
Maximum Column Temperature: 0.0  
Average Column Temperature: 0.0  
Measured Loop Volume: 0.000  
Measured Loop Volume No Pressure: 0.000

----- oOo -----

----- Generic Instrument Postrun Report -----

LC\_MS Report

Date:24-Jun-2019  
Instrument:ACQ-SQD#LBA849

Vial:2:21  
Time:08:43:41  
ID:

Description:  
Sample: 5

Printed: Mon Jun 24 08:46:14 2019

Sample Report (continued):

Software Version: 1.70.2074  
Firmware Version: 1.65.6229 (May 07 2015)  
Checksum: 0xdc2f6074  
Serial Number: G11UPD257A  
Lamp On/Off Event: No  
Lamp Life: 271.00 hours  
Lamp Serial Number: 000214342  
Exposure Time: 50.000 msec  
Lambda1: 187.058  
Lambda512: 502.400  
Flow Cell Type: Analytical LG  
Flow Cell Path Length: 10.000 mm  
Flow Cell Volume: 0.500 microliters  
Flow Cell Serial Number: PDA10-01896  
Flow Cell Part Number: 205015017  
Optics Temperature Stabilization Setting: Normal Temperature

----- oOo -----

----- Waters Acquity CM Postrun Report -----

Software Version: 1.69.2942  
Firmware Version: 1.40.74 (Oct 27 2011)  
Checksum: 0x8e9d1dc0  
Serial Number: G11UPM366G  
Valve Position: 3  
Total Injections on Column: 0  
Minimum Column Temperature: 50.0 C  
Maximum Column Temperature: 50.0 C  
Average Column Temperature: 50.0 C

----- oOo -----
